# Supplementary material
Source: Springer Nature journal article supplement (https://www.springermedizin.de/resource/supplementary/12916_2012_711_MOESM5_ESM.pdf/9598732)

FVL-CONTROL

FVL Q/+ -APS

FVL Q/Q -APS

H-E

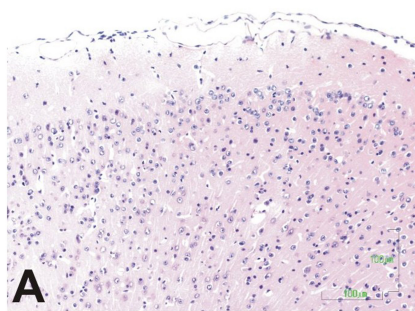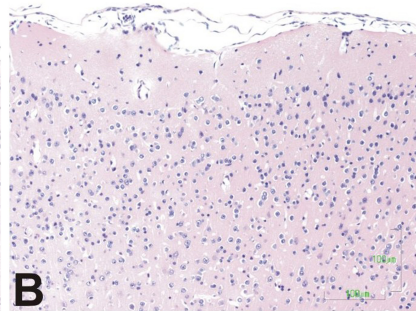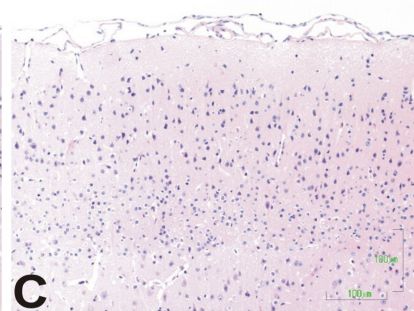

LFB

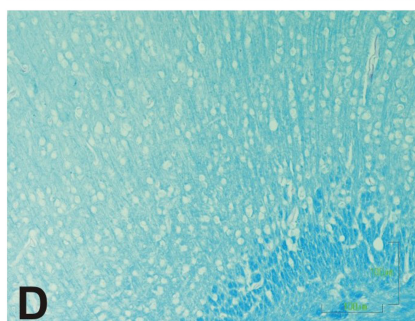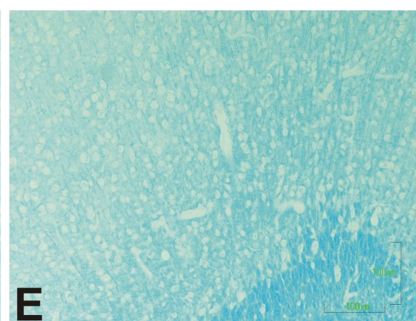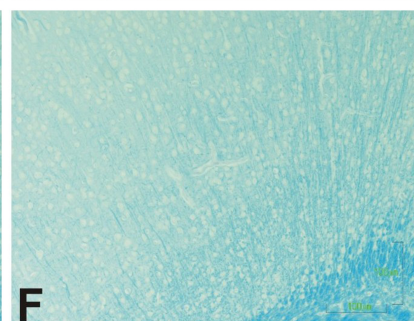

BLS

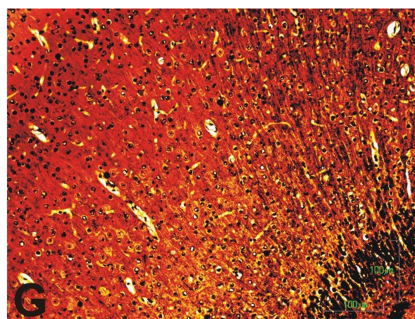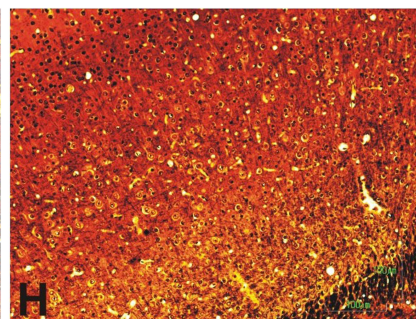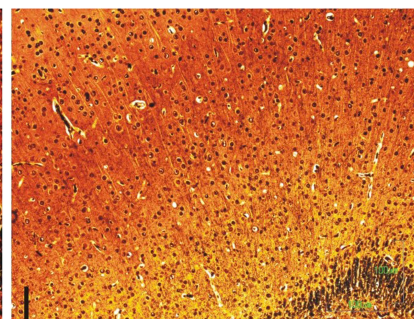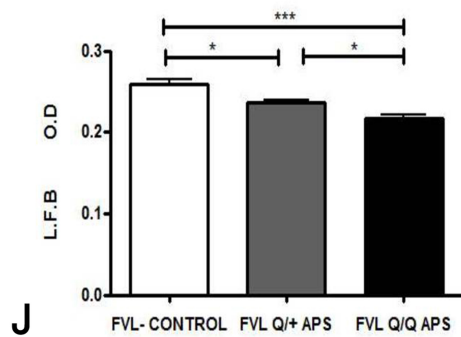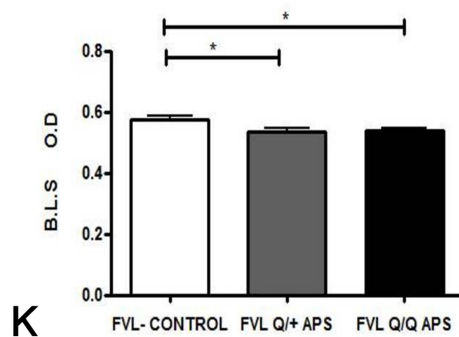

Supplement: MOESM5 [file 9598732]
